# Supplementary material for: A Combination of Novel Microecological Agents and Molasses Role in Digestibility and Fermentation of Rice Straw by Facilitating the Ruminal Microbial Colonization
Source: Frontiers journal article supplement (doi:10.3389/fmicb.2022.948049), 2022-07-14
Supplement: Data_Sheet_1.PDF [file Data_Sheet_1.PDF]

a

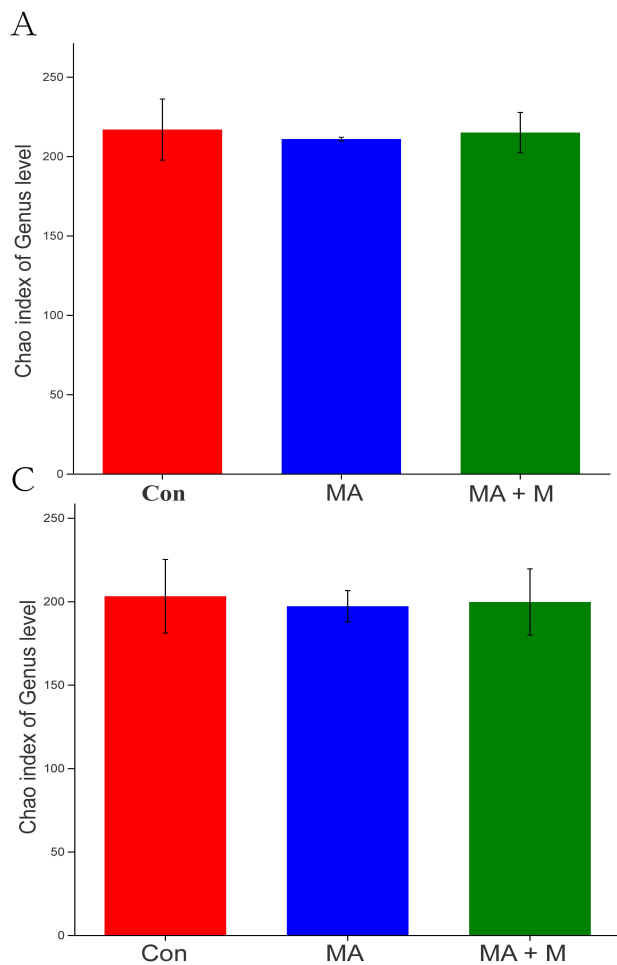

b

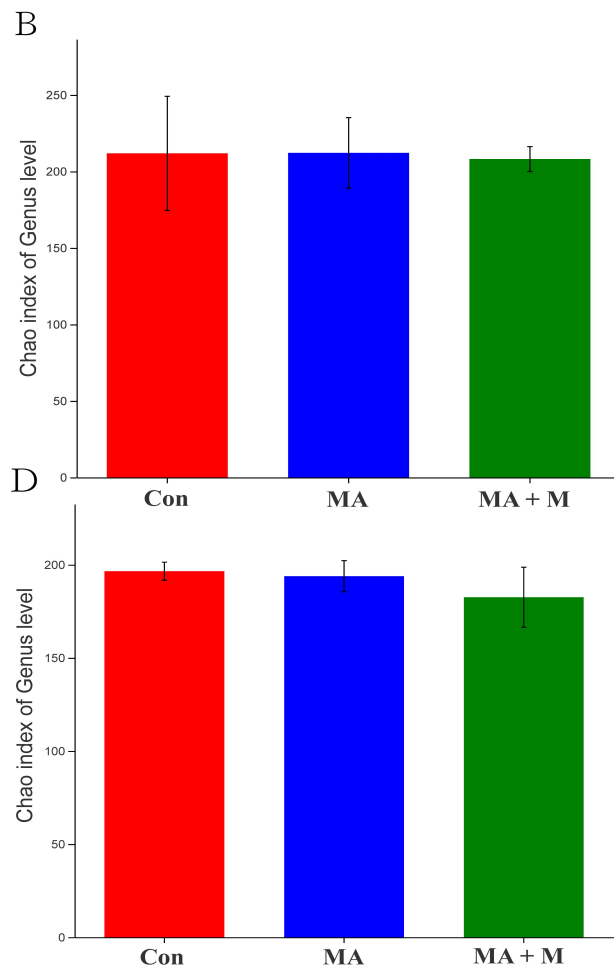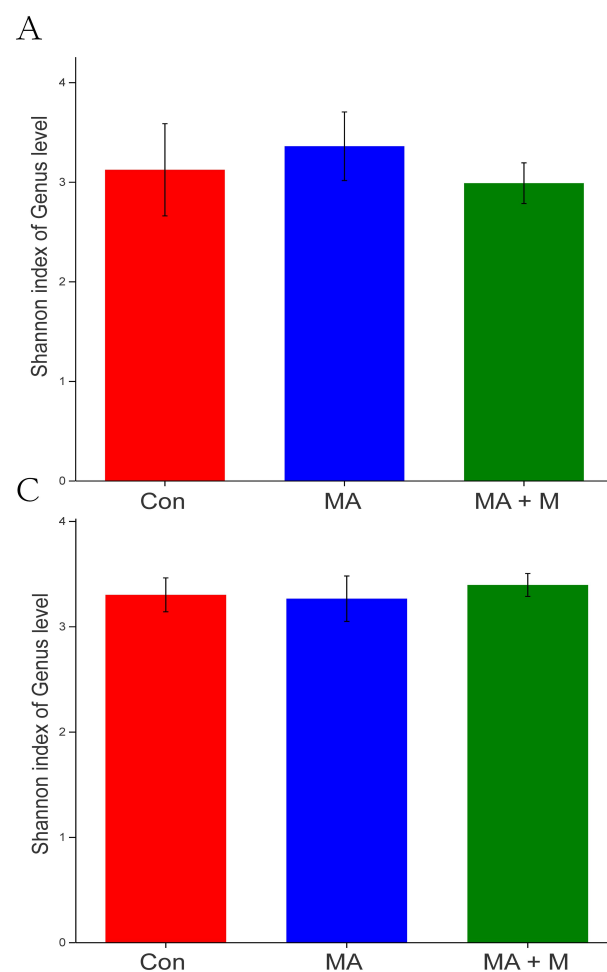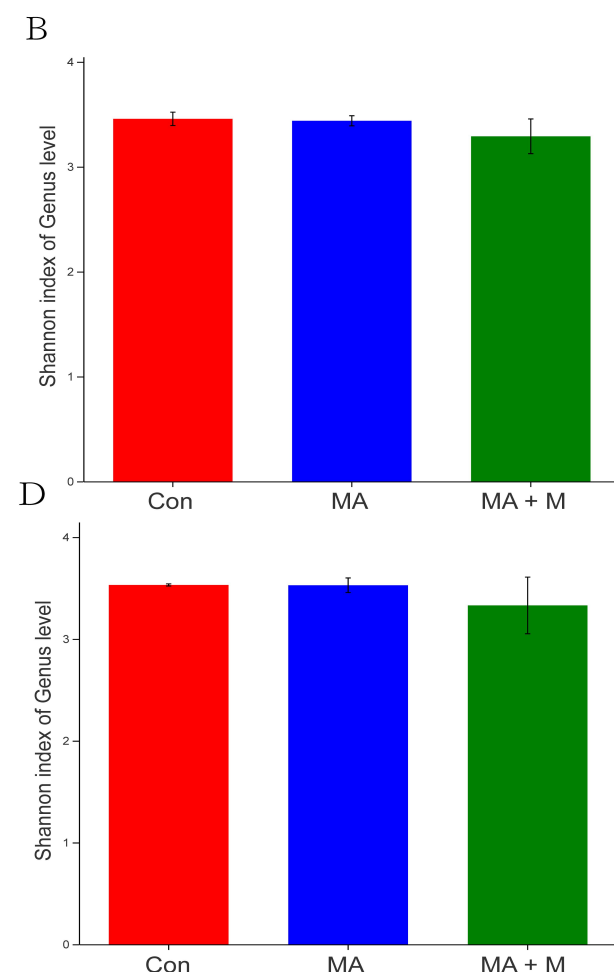

**Figure S1:**  $\alpha$ -diversity of different groups after incubation in rumen 0.5 h (A), 4 h (B), 12 h (C) and 24 h (D) by chao1 and shannon index in genus level. Con: no additive, control; MA: added microecological agents; MA + M: a combination of microecological agents and molasses; Data were mean  $\pm$  SEM.  $P$  values were determined using the t-test. \* $P \leq 0.05$ , \*\* $P \leq 0.01$ .
